# Supplementary material for: Abscisic Acid and Cytokinins Are Not Involved in the Regulation of Stomatal Conductance of Scots Pine Saplings during Post-Drought Recovery
Source: MDPI journal article supplement (doi:10.3390/biom13030523), 2023-03-13
Supplement: s1 [file s1]

**Table S1.** The contents (pmol/g DW) of abscisic acid, cytokinins and their metabolites, and CK/ABA ratios in needles of Scots pine plants in Experiment 1.

| Hormones                               | Day 0           |                  | Day 3           |                  |                  | Day 14          |                  |                 |
|----------------------------------------|-----------------|------------------|-----------------|------------------|------------------|-----------------|------------------|-----------------|
|                                        | control         | drought          | control         | drought          | recovery         | control         | drought          | recovery        |
| ABA and metabolites (pmol/g DW)        |                 |                  |                 |                  |                  |                 |                  |                 |
| ABA                                    | 301.0 ± 49.0    | 752.5 ± 73.7*    | 389.1 ± 23.1    | 1338.0 ± 142.2*  | 483.7 ± 34.2*    | 366.4 ± 54.3    | 2144.9 ± 191.2*  | 464.4 ± 67.6    |
| ABA-Me                                 | 19.7 ± 2.9      | 52.8 ± 12.3*     | 28.8 ± 3.2      | 118.8 ± 26.1*    | 30.2 ± 3.4       | 33.4 ± 5.2      | 85.6 ± 23.4*     | 23.0 ± 4.6      |
| ABA-GE                                 | 102784 ± 8480   | 125282 ± 10258   | 129730 ± 13900  | 186827 ± 13187*  | 122316 ± 10039   | 98030 ± 7921    | 88308 ± 12922    | 84177 ± 63661   |
| PA                                     | 233.7 ± 16.9    | 177.0 ± 39.6     | 245.9 ± 36.5    | 220.5 ± 32.2     | 136.1 ± 11.3*    | 165.6 ± 15.5    | 363.9 ± 100.8    | 110.9 ± 18.2*   |
| DPA                                    | 20.7 ± 4.2      | 12.9 ± 2.5       | 18.3 ± 3.9      | 15.7 ± 2.0       | 41.9 ± 8.4*      | 14.6 ± 1.7      | 57.0 ± 14.0*     | 30.3 ± 9.8      |
| 7OH-ABA                                | 200.9 ± 23.0    | 772.2 ± 99.5*    | 225.4 ± 37.8    | 2254.9 ± 232.7*  | 1470.2 ± 313.6*  | 367.8 ± 69.4    | 5131.5 ± 1030.0* | 458.4 ± 89.7    |
| 9OH-ABA                                | 231.1 ± 26.0    | 140.2 ± 22.4     | 226.9 ± 33.7    | 240.3 ± 40.4     | 132.0 ± 15.3*    | 152.9 ± 14.0    | 335.9 ± 93.0     | 102.4 ± 16.8*   |
| Cytokinins and metabolites (pmol/g DW) |                 |                  |                 |                  |                  |                 |                  |                 |
| <i>t</i> Z                             | 0.83 ± 0.16     | 1.37 ± 0.11*     | 0.78 ± 0.10     | 1.53 ± 0.22*     | 0.96 ± 0.15      | 1.08 ± 0.10     | 3.79 ± 0.45*     | 1.50 ± 0.14*    |
| DZ                                     | 0.97 ± 0.23     | 2.80 ± 0.54*     | 1.00 ± 0.20     | 2.25 ± 0.11*     | 3.54 ± 0.26*     | 1.05 ± 0.17     | 5.37 ± 0.31*     | 1.90 ± 0.35     |
| iP                                     | 2.28 ± 0.27     | 1.83 ± 0.21      | 2.37 ± 0.28     | 3.75 ± 0.39*     | 3.09 ± 0.42      | 2.04 ± 0.41     | 2.23 ± 0.36      | 2.36 ± 0.32     |
| <i>t</i> ZR                            | 29.1 ± 3.0      | 37.3 ± 2.6       | 21.7 ± 1.3      | 31.0 ± 3.0*      | 37.9 ± 2.5*      | 26.5 ± 3.1      | 43.6 ± 4.4*      | 33.7 ± 2.8      |
| DZR                                    | 15.7 ± 1.1      | 26.3 ± 2.1*      | 16.6 ± 1.6      | 18.6 ± 1.6       | 27.9 ± 4.9       | 16.4 ± 2.8      | 24.4 ± 3.3       | 23.1 ± 4.2      |
| iPR                                    | 3.25 ± 0.59     | 5.95 ± 1.17      | 4.09 ± 0.62     | 8.17 ± 0.95*     | 4.64 ± 0.59      | 4.14 ± 0.46     | 5.47 ± 0.63      | 5.79 ± 1.17     |
| <i>c</i> ZR                            | 11.0 ± 1.0      | 17.1 ± 1.6*      | 11.9 ± 2.0      | 16.7 ± 1.4       | 16.2 ± 1.3       | 11.6 ± 1.3      | 17.8 ± 2.9       | 14.6 ± 2.0      |
| <i>t</i> ZOG                           | 60.3 ± 5.3      | 62.6 ± 6.7       | 37.6 ± 3.8      | 42.0 ± 5.1       | 62.7 ± 10.3*     | 49.5 ± 4.0      | 93.4 ± 11.4*     | 64.8 ± 11.1     |
| <i>t</i> ZROG                          | 226.0 ± 18.5    | 222.2 ± 6.2      | 227.6 ± 23.8    | 238.1 ± 45.4     | 184.8 ± 20.2     | 250.8 ± 6.0     | 295.0 ± 22.5     | 322.3 ± 53.3    |
| DZOG                                   | 107.6 ± 5.5     | 130.8 ± 15.8     | 114.6 ± 4.3     | 97.4 ± 18.2      | 134.3 ± 15.9     | 123.1 ± 12.5    | 159.6 ± 19.8     | 146.0 ± 25.3    |
| DZROG                                  | 110.4 ± 18.0    | 102.8 ± 8.7      | 77.2 ± 5.6      | 108.6 ± 14.8     | 100.8 ± 13.9     | 95.7 ± 11.4     | 107.7 ± 14.1     | 129.4 ± 18.3    |
| <i>c</i> ZOG                           | 20.9 ± 5.2      | 18.3 ± 2.3       | 13.9 ± 2.9      | 16.9 ± 2.4       | 34.0 ± 9.7       | 61.8 ± 13.6     | 29.8 ± 7.1       | 31.3 ± 9.7      |
| <i>c</i> ZROG                          | 594.6 ± 82.0    | 658.0 ± 57.5     | 595.9 ± 35.2    | 611.5 ± 47.4     | 781.5 ± 51.8*    | 748.4 ± 34.0    | 695.0 ± 37.1     | 885.3 ± 59.0    |
| <i>t</i> ZRMP                          | 13.5 ± 1.7      | 15.2 ± 3.3       | 13.3 ± 1.9      | 16.4 ± 2.3       | 14.9 ± 2.0       | 16.3 ± 1.5      | 16.5 ± 2.4       | 18.8 ± 2.2      |
| DZRMP                                  | 2.76 ± 0.63     | 21.4 ± 2.62*     | 4.32 ± 0.58     | 6.85 ± 0.90*     | 5.42 ± 1.01      | 5.17 ± 0.94     | 7.20 ± 0.57      | 8.13 ± 0.84*    |
| iPRMP                                  | 18.2 ± 2.2      | 21.1 ± 3.6       | 15.4 ± 1.4      | 25.5 ± 2.0*      | 22.0 ± 3.3       | 21.9 ± 3.8      | 14.9 ± 2.3       | 25.6 ± 2.2      |
| <i>c</i> ZRMP                          | 17.8 ± 2.9      | 49.7 ± 8.5*      | 22.0 ± 3.4      | 43.3 ± 7.9       | 45.9 ± 9.3       | 25.2 ± 3.0      | 35.3 ± 3.3*      | 27.8 ± 2.5      |
| CK/ABA ratios                          |                 |                  |                 |                  |                  |                 |                  |                 |
| <i>t</i> Z/ABA                         | 0.0034 ± 0.0010 | 0.0019 ± 0.0002  | 0.0020 ± 0.0002 | 0.0012 ± 0.0002* | 0.0020 ± 0.0003  | 0.0032 ± 0.0004 | 0.0018 ± 0.0002* | 0.0039 ± 0.0010 |
| DZ/ABA                                 | 0.0034 ± 0.0007 | 0.0036 ± 0.0005  | 0.0026 ± 0.0005 | 0.0018 ± 0.0002  | 0.0076 ± 0.0009* | 0.0032 ± 0.0006 | 0.0026 ± 0.0001  | 0.0041 ± 0.0005 |
| iP/ABA                                 | 0.0085 ± 0.0014 | 0.0025 ± 0.0002* | 0.0063 ± 0.0009 | 0.0029 ± 0.0002* | 0.0068 ± 0.0013  | 0.0057 ± 0.0010 | 0.0011 ± 0.0002* | 0.0063 ± 0.0019 |

ABA, abscisic acid; ABA-Me, ABA-methyl ester; ABA-GE, ABA-glucosyl ester; PA, phaseic acid; DPA, dihydrophaseic acid; 7OH-ABA, 7-hydroxy-ABA; 9OH-ABA, 9-hydroxy-ABA; *t*Z, *trans*-zeatin; DZ, dihydrozeatin; iP, N<sup>6</sup>-(Δ<sup>2</sup>-isopentenyl)adenine; *t*ZR, *trans*-zeatin 9-riboside; DZR, dihydrozeatin 9-riboside; iPR, N<sup>6</sup>-(Δ<sup>2</sup>-isopentenyl)adenosine; *c*ZR, *cis*-zeatin 9-riboside; *t*ZOG, *trans*-zeatin O-glucoside; *t*ZROG, *trans*-zeatin 9-riboside O-glucoside; DZOG, dihydrozeatin O-glucoside; DZROG, dihydrozeatin 9-riboside O-glucoside; *c*ZOG, *cis*-zeatin O-glucoside; *c*ZROG, *cis*-zeatin 9-riboside O-glucoside; *t*ZRMP, *trans*-zeatin 9-riboside-5'-monophosphate; DZRMP, dihydrozeatin 9-riboside-5'-monophosphate; iPRMP, N<sup>6</sup>-(Δ<sup>2</sup>-isopentenyl)adenosine-5'-monophosphate; *c*ZRMP, *cis*-zeatin 9-riboside-5'-monophosphate. Pairwise comparisons of the means were performed between control and drought-stressed plants and control and recovering plants at each separate time point using Student's *t* test or Mann-Whitney rank sum test. Asterisks (\*) denote significant differences at *p* < 0.05 between the control and experimental variants at each time point.

**Table S2.** Pearson correlations between contents of abscisic acid and their metabolites.

|         | ABA-Me         | ABA-GE        | PA             | DPA           | 7OH-ABA        | 9OH-ABA        |
|---------|----------------|---------------|----------------|---------------|----------------|----------------|
| ABA     | <b>0.66***</b> | 0.17          | <b>0.53***</b> | <b>0.38**</b> | <b>0.89***</b> | <b>0.54***</b> |
| ABA-Me  |                | <b>0.37**</b> | 0.23           | -0.06         | <b>0.64***</b> | 0.22           |
| ABA-GE  |                |               | 0.01           | -0.21         | -0.04          | 0.11           |
| PA      |                |               |                | <b>0.35*</b>  | <b>0.53***</b> | <b>0.95***</b> |
| DPA     |                |               |                |               | <b>0.40**</b>  | <b>0.34*</b>   |
| 7OH-ABA |                |               |                |               |                | <b>0.53***</b> |

\* Pairs with  $p < 0.050$ ; \*\* pairs with  $p < 0.010$ ; \*\*\* pairs with  $p < 0.001$ . ABA, abscisic acid; ABA-Me, ABA-methyl ester; ABA-GE, ABA-glucosyl ester; PA, phaseic acid; DPA, dihydrophaseic acid; 7OH-ABA, 7-hydroxy-ABA; 9OH-ABA, 9-hydroxy-ABA.

**Table S3.** Pearson correlations between contents of cytokinins and their metabolites.

| Cytokinins and metabolites |                |                |                |                |
|----------------------------|----------------|----------------|----------------|----------------|
|                            | <i>t</i> ZR    | <i>t</i> Z     | <i>t</i> ZOG   | <i>t</i> ZROG  |
| <i>t</i> ZRMP              | 0.17           | 0.03           | -0.09          | 0.25           |
| <i>t</i> ZR                |                | <b>0.45**</b>  | <b>0.44***</b> | <b>0.31*</b>   |
| <i>t</i> Z                 |                |                | <b>0.52***</b> | <b>0.34*</b>   |
| <i>t</i> ZOG               |                |                |                | <b>0.43**</b>  |
|                            | DZR            | DZ             | DZOG           | DZROG          |
| DZRMP                      | <b>0.36*</b>   | <b>0.30*</b>   | 0.21           | 0.06           |
| DZR                        |                | <b>0.50***</b> | <b>0.60***</b> | <b>0.42***</b> |
| DZ                         |                |                | <b>0.44**</b>  | 0.16           |
| DZOG                       |                |                |                | <b>0.56***</b> |
|                            | <i>c</i> ZR    | <i>c</i> ZOG   | <i>c</i> ZROG  | -              |
| <i>c</i> ZRMP              | 0.28           | 0.09           | -0.07          | -              |
| <i>c</i> ZR                |                | -0.04          | 0.05           | -              |
| <i>c</i> ZOG               |                |                | 0.22           | -              |
|                            | iPR            | iPR-MeS        | iP             | iP7G           |
| iPRMP                      | <b>0.52***</b> | -0.09          | 0.01           | 0.16           |
| iPR                        |                | 0.03           | 0.05           | 0.11           |
| iPR-MeS                    |                |                | 0.03           | <b>0.32*</b>   |
| iP                         |                |                |                | -0.27          |

\* Pairs with  $p < 0.050$ ; \*\* pairs with  $p < 0.010$ ; \*\*\* pairs with  $p < 0.001$ . *t*Z, *trans*-zeatin; DZ, dihydrozeatin; iP, N<sup>6</sup>-(Δ<sup>2</sup>-isopentenyl)adenine; *t*ZR, *trans*-zeatin 9-riboside; DZR, dihydrozeatin 9-riboside; iPR, N<sup>6</sup>-(Δ<sup>2</sup>-isopentenyl)adenosine; *c*ZR, *cis*-zeatin 9-riboside; *t*ZOG, *trans*-zeatin O-glucoside; *t*ZROG, *trans*-zeatin 9-riboside O-glucoside; DZOG, dihydrozeatin O-glucoside; DZROG, dihydrozeatin 9-riboside O-glucoside; *c*ZOG, *cis*-zeatin O-glucoside; *c*ZROG, *cis*-zeatin 9-riboside O-glucoside; *t*ZRMP, *trans*-zeatin 9-riboside-5'-monophosphate; DZRMP, dihydrozeatin 9-riboside-5'-monophosphate; iPRMP, N<sup>6</sup>-(Δ<sup>2</sup>-isopentenyl)adenosine-5'-monophosphate; *c*ZRMP, *cis*-zeatin 9-riboside-5'-monophosphate; iP7G, isopentenyl adenine-7-glucoside; iPR-MeS, 2-methylthio isopentenyl adenosine.
